# Supplementary material for: Differential Magnitude of Resilience between Emotional Intelligence and Life Satisfaction in Mountain Sports Athletes
Source: MDPI journal article supplement (doi:10.3390/ijerph20156525), 2023-08-04
Supplement: s1 [file s1]

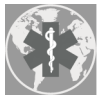

# Differential magnitude of resilience between emotional intelligence and life satisfaction in mountain sports athletes

Guillermo Sanz-Junoy, Óscar Gavín-Chocano, José L. Ubago-Jiménez and David Molero

## Supplementary Material

### Factor loadings

From the data obtained with each of the instruments (Table Supplementary S1), a Confirmatory Factor Analysis (CFA) was performed to verify the validity and internal structure of each item. The factor loadings for the items of the EI scale (WLEIS-S), exhibited an adequate fit [62],  $\chi^2/df = 2.856$ , with CFI = 0.962, SRMR = .0380, RMSEA = .0706. The reliability of this scale was Cronbach's  $\alpha = .874$  and McDonald's  $\omega = .878$ .

Table Supplementary S1. Factor loadings WLEIS-S.

| Latent factor                         | Indicator | $\alpha$ | $\omega$ | Estimate | SE    | Z    | p      | $\beta$ | AVE  | CR   |
|---------------------------------------|-----------|----------|----------|----------|-------|------|--------|---------|------|------|
| Appraisal of one's own emotions (SEA) | SEA 1     | .862     | .865     | .791     | .0123 | 64.1 | < .001 | .791    | .645 | .877 |
|                                       | SEA 2     | .859     | .862     | .877     | .0112 | 78.6 | < .001 | .904    |      |      |
|                                       | SEA 3     | .859     | .862     | .874     | .0116 | 75.1 | < .001 | .878    |      |      |
|                                       | SEA 4     | .865     | .870     | .623     | .0140 | 44.4 | < .001 | .603    |      |      |
| Appraisal of others' emotions (OEA)   | OEA 5     | .867     | .873     | .767     | .0148 | 51.8 | < .001 | .713    | .568 | .839 |
|                                       | OEA 6     | .867     | .872     | .975     | .0160 | 61.1 | < .001 | .807    |      |      |
|                                       | OEA 7     | .872     | .877     | .716     | .0159 | 45.2 | < .001 | .639    |      |      |
|                                       | OEA 8     | .863     | .870     | .898     | .0140 | 64.2 | < .001 | .838    |      |      |
| Use of emotion (UOE)                  | UOE 9     | .870     | .874     | .669     | .0169 | 39.6 | < .001 | .546    | .621 | .863 |
|                                       | UOE 10    | .865     | .870     | .893     | .0161 | 55.5 | < .001 | .713    |      |      |
|                                       | UOE 11    | .859     | .866     | 1.117    | .0137 | 81.3 | < .001 | .921    |      |      |
|                                       | UOE 12    | .860     | .866     | 1.109    | .0139 | 80.0 | < .001 | .912    |      |      |
| Regulation of emotion (ROE)           | ROE 13    | .862     | .865     | 1.135    | .0116 | 98.1 | < .001 | .963    |      |      |
|                                       |           |          |          |          |       |      |        |         | .596 | .846 |
|                                       | ROE 14    | .859     | .862     | .862     | .0138 | 62.6 | < .001 | .760    |      |      |
|                                       | ROE 15    | .859     | .862     | .857     | .0137 | 62.6 | < .001 | .518    |      |      |
|                                       | ROE 16    | .865     | .870     | 1.128    | .0115 | 98.1 | < .001 | .316    |      |      |

Note: SE: Standardized error; Z: Z-value at estimation; p: p-value of Z-estimate;  $\beta$ : Standardized Estimate; AVE: Average Variance Extracted; CR: Critical Ratio.

The factor loadings for the items of the Resilience scale (RS-14), had adequate fit [62];  $\chi^2/df = 3.021$ ; with CFI = 0.901; SRMR = .0454; RMSEA = .0798. The reliability of this scale was Cronbach's  $\alpha = .904$  and McDonald's  $\omega = .910$  (See Table Supplementary S2).

**Table Supplementary S2.** Factor loadings RS-14.

| Latent Factor                     | Indicator | $\alpha$ | $\omega$ | Estimate | SE    | Z    | p      | $\beta$ | AVE  | CR   |
|-----------------------------------|-----------|----------|----------|----------|-------|------|--------|---------|------|------|
| Personal competence (PC)          | PC 1      | .897     | .904     | .594     | .0118 | 50.6 | < .001 | .667    | .552 | .877 |
|                                   | PC 2      | .897     | .900     | .661     | .0130 | 50.7 | < .001 | .668    |      |      |
|                                   | PC 3      | .898     | .905     | .784     | .0160 | 49.1 | < .001 | .652    |      |      |
|                                   | PC 4      | .893     | .904     | .839     | .0140 | 59.8 | < .001 | .754    |      |      |
|                                   | PC 5      | .900     | .907     | .755     | .0168 | 44.8 | < .001 | .606    |      |      |
|                                   | PC 6      | .898     | .899     | .529     | .0114 | 46.5 | < .001 | .624    |      |      |
|                                   | PC 7      | .901     | .904     | .601     | .0145 | 41.3 | < .001 | .566    |      |      |
|                                   | PC 8      | .892     | .904     | .878     | .0141 | 62.4 | < .001 | .777    |      |      |
|                                   | PC 9      | .898     | .899     | .584     | .0124 | 47.2 | < .001 | .631    |      |      |
|                                   | PC 10     | .897     | .909     | .691     | .0141 | 48.9 | < .001 | .650    |      |      |
|                                   | PC 11     | .894     | .901     | .656     | .0107 | 61.1 | < .001 | .765    |      |      |
| Acceptance of self and life (ASL) | ASL 12    | .905     | .909     | .699     | .0185 | 37.9 | < .001 | .557    | .504 | .760 |
|                                   | ASL 13    | .894     | .904     | .967     | .0168 | 57.4 | < .001 | .810    |      |      |
|                                   | ASL 14    | .904     | .900     | .576     | .0174 | 33.1 | < .001 | .496    |      |      |

Note: SE: Standardized error; Z: Z-value at estimation; p: p-value of Z-estimate;  $\beta$ : Standardized Estimate; AVE: Average Variance Extracted; CR: Critical Ratio.

The factor loadings for the items of the Satisfaction with Life Scale (SWLS), had adequate fit [62];  $\chi^2/df = 3.243$ ; with CFI = 0.969; SRMR = .0587; RMSEA = .0696. The reliability of this scale was Cronbach's  $\alpha = .883$  and McDonald's  $\omega = .903$  (See Table Supplementary S3).

**Table Supplementary S3.** Factor loadings SWLS.

| Latent Factor         | Indicator | $\alpha$ | $\omega$ | Estimate | SE    | Z    | p      | $\beta$ | AVE  | CR   |
|-----------------------|-----------|----------|----------|----------|-------|------|--------|---------|------|------|
| Life satisfaction(LS) | LS 1      | .832     | .852     | 1.175    | .0120 | 98.2 | < .001 | .986    | .593 | .852 |
|                       | LS 2      | .864     | .895     | .752     | .0146 | 51.6 | < .001 | .658    |      |      |
|                       | LS 3      | .832     | .852     | 1.168    | .0119 | 98.0 | < .001 | .939    |      |      |
|                       | LS 4      | .857     | .892     | .768     | .0148 | 51.9 | < .001 | .661    |      |      |
|                       | LS 5      | .909     | .915     | .864     | .0218 | 39.6 | < .001 | .530    |      |      |

Note: SE: Standardized error; Z: Z-value at estimation; p: p-value of Z-estimate;  $\beta$ : Standardized Estimate; AVE: Average Variance Extracted; CR: Critical Ratio.
